# Supplementary material for: New method for detection of T4 polynucleotide kinase phosphatase activity through isothermal EXPonential amplification reaction
Source: Royal Society of Chemistry journal article supplement (doi:10.1039/c8an02368a), 2019-01-01
Supplement: c8an02368a1.pdf [file c8an02368a1.pdf]

## New Method for Detection of T4 Polynucleotide Kinase Phosphatase Activity through Isothermal EXponential Amplification Reaction

Huinan Chen <sup>a, #</sup>, Zihan Wang <sup>a, #</sup>, Xu Chen<sup>a</sup>, Kai Lou<sup>b</sup>, Anzhi Sheng<sup>a</sup>, Tianshu Chen<sup>a</sup>, Guifang Chen <sup>a, c, \*</sup>,  
Juan Zhang <sup>a, \*</sup>

a. Center for Molecular Recognition and Biosensing, School of Life Sciences, Shanghai University, Shanghai 200444, P. R. China

b. Shenzhen Shineway Hi-Tech Co., Ltd. P. R. China

c. Department of Bioengineering, University of Washington, Seattle, WA 98195, USA.

### 1. DNA sequences

DNA sequences have been exhibited in Table S1. The specific recognition sequence for Nt.BstNBI is underlined.

Table S1 DNA sequences

| DNA                | Sequences (5' → 3')                                                                               |
|--------------------|---------------------------------------------------------------------------------------------------|
| 22-nt trigger (S)  | TGA GGT AGT AGG TTG TAT AGT T-PO <sub>4</sub>                                                     |
| 54-nt template (L) | AAC TAT ACA ACC TAC TAC CTC <u>AAA CAG ACT CAA</u> ACT ATA CAA<br>CCT ACT ACC TCA-NH <sub>3</sub> |

### 2. Results and discussion

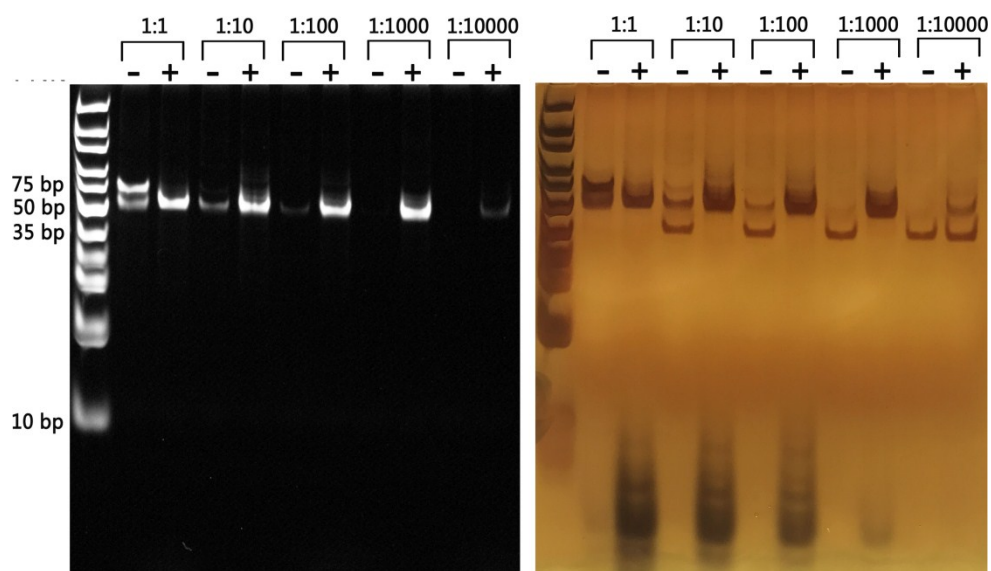

**Fig. S1** Electropherogram for polyacrylamide gel electrophoresis and the corresponding result after silver staining with T4 PNKP and without T4 PNKP at different molar ratios between S strand and L strand
